# Supplementary material for: Bone Marrow Soluble Mediator Signatures of Patients With Philadelphia Chromosome-Negative Myeloproliferative Neoplasms
Source: PubMed Central journal article supplement (PMC8167065; doi:10.3389/fonc.2021.665037), 2021-05-18
Supplement: DataSheet_1.pdf [file DataSheet_1.pdf]

## *Supplementary Material*

**Table S1.** Demographic data from healthy subjects (control group, CTRL)

| <b>Patient ID</b> | <b>Age (years)</b> | <b>Gender</b> |
|-------------------|--------------------|---------------|
| C11               | 68                 | Female        |
| C13               | 49                 | Female        |
| C15               | 50                 | Male          |
| C16               | 46                 | Female        |
| C17               | 83                 | Female        |
| C18               | 31                 | Female        |
| C19               | 66                 | Female        |
| C20               | 58                 | Male          |
| C22               | 54                 | Female        |
| C23               | 72                 | Male          |
| C24               | 38                 | Female        |
| C25               | 60                 | Female        |
| C100              | 36                 | Male          |
| C101              | 24                 | Female        |
| C102              | 37                 | Male          |
| C103              | 34                 | Female        |
| C104              | 19                 | Male          |

**Table S2.** Demographic data and clinic-laboratory parameters from patients with polycythemia vera (PV).

| Code  | Mutation               | Age | Gender | Treatment | Risk | VE  | Fibrosis rate |
|-------|------------------------|-----|--------|-----------|------|-----|---------------|
| P77   | JAK2V617F <sup>+</sup> | 76  | M      | ---       | High | Yes | 0             |
| P83   | JAK2V617F <sup>+</sup> | 75  | M      | HU        | High | Yes | 3             |
| P86   | JAK2V617F <sup>+</sup> | 57  | M      | ---       | High | Yes | 2             |
| P90   | JAK2V617F <sup>+</sup> | 61  | M      | ASA       | High | No  | 4             |
| P101  | JAK2V617F <sup>+</sup> | 69  | F      | ---       | High | No  | 1             |
| P102  | JAK2V617F <sup>+</sup> | 61  | F      | ---       | High | No  | 0             |
| P105  | JAK2V617F <sup>+</sup> | 78  | F      | ---       | High | No  | 0             |
| P106  | JAK2V617F <sup>+</sup> | 67  | M      | ---       | High | Yes | 0             |
| P108  | JAK2V617F <sup>+</sup> | 65  | M      | ASA       | High | No  | NA            |
| P71   | JAK2V617F <sup>+</sup> | 54  | F      | ---       | Low  | No  | 0             |
| P85   | JAK2V617F <sup>+</sup> | 60  | M      | ---       | High | No  | 0             |
| P59   | JAK2V617F <sup>+</sup> | 66  | M      | ---       | High | No  | 1             |
| P43.2 | JAK2V617F <sup>+</sup> | 71  | F      | ---       | High | No  | 0             |
| P45.2 | JAK2V617F <sup>+</sup> | 61  | M      | ---       | High | No  | 0             |
| P51.2 | JAK2V617F <sup>+</sup> | 62  | M      | ---       | High | Yes | 0             |
| P63.2 | JAK2V617F <sup>+</sup> | 63  | M      | ---       | High | Yes | 1             |
| P87   | JAK2V617F <sup>+</sup> | 51  | F      | ---       | Low  | No  | 1             |
| P47.2 | JAK2V617F              | 31  | F      | ---       | Low  | No  | 0             |
| P80   | JAK2V617F <sup>+</sup> | 46  | M      | HU        | Low  | Yes | 1             |

ASA: acetylsalicylic acid. F: female. HU: hydroxycarbamide (hydroxyurea). JAK2V617F<sup>+</sup>: positive for JAK2V617F mutation. M: male. NA: not available. VE: previous vascular event.

**Table S3.** Demographic data and clinic-laboratory parameters from patients with essential thrombocythemia (ET).

| Code  | Mutation status        | Age | Gender | Treatment | Risk     | VE  | Fibrosis rate | Reticulin rate |
|-------|------------------------|-----|--------|-----------|----------|-----|---------------|----------------|
| P28   | JAK2V617F <sup>+</sup> | 74  | F      | ---       | High     | No  | 2             | NA             |
| P55   | JAK2V617F <sup>+</sup> | 35  | F      | HU        | High     | Yes | 0             | 0              |
| P91   | JAK2V617F <sup>+</sup> | 81  | M      | ASA, HU   | High     | No  | 3             | 3              |
| P35.2 | JAK2V617F <sup>+</sup> | 72  | M      | HU        | High     | No  | 2             | 0              |
| P46.2 | JAK2V617F <sup>+</sup> | 77  | M      | ---       | High     | Yes | 0             | 0              |
| P49   | JAK2V617F <sup>+</sup> | 76  | F      | ---       | High     | NA  | NA            | NA             |
| P58.2 | JAK2V617F <sup>+</sup> | 69  | F      | ---       | High     | Yes | 0             | 0              |
| P38.2 | JAK2V617F <sup>+</sup> | 46  | F      | HU        | High     | Yes | 0             | 1              |
| 63    | JAK2V617F <sup>+</sup> | 52  | F      | ASA       | Low      | No  | 0             | 1              |
| P68   | JAK2V617F <sup>+</sup> | 66  | F      | HU        | High     | NA  | 1             | 4              |
| P81   | JAK2V617F <sup>+</sup> | 36  | F      | ---       | Low      | NA  | 0             | 0              |
| P93   | JAK2V617F <sup>+</sup> | 59  | F      | ---       | Low      | No  | 0             | 0              |
| P104  | JAK2V617F <sup>+</sup> | 42  | F      | ---       | Low      | No  | NA            | NA             |
| P12   | CALR <sup>+</sup>      | 66  | F      | HU        | Int      | No  | 0             | 0              |
| P66   | CALR <sup>+</sup>      | 77  | F      | ASA       | Int      | No  | 1             | NA             |
| P76   | CALR <sup>+</sup>      | 76  | F      | ---       | Int      | No  | 0             | 2              |
| P78   | CALR <sup>+</sup>      | 20  | F      | ---       | Very low | No  | 0             | 0              |
| P53   | CALR <sup>+</sup>      | 62  | M      | HU        | Int      | No  | 0             | 0              |
| P54.2 | CALR <sup>+</sup>      | 59  | F      | ---       | Very low | No  | 0             | NA             |
| P56.2 | CALR <sup>+</sup>      | 85  | F      | ---       | Int      | No  | 0             | NA             |
| P53.2 | DN                     | 51  | F      | ---       | Very Low | No  | 0             | 0              |
| P75   | DN                     | 61  | F      | ---       | Int      | No  | 0             | 0              |
| P88   | DN                     | 44  | M      | ---       | High     | Yes | 1             | NA             |
| P48.2 | JAK2V617F <sup>-</sup> | 61  | M      | ---       | Int      | No  | 0             | 0              |
| P61   | JAK2V617F <sup>-</sup> | 71  | F      | ASA, HU   | Int      | No  | 0             | 0              |
| P65   | JAK2V617F <sup>-</sup> | 50  | F      | ---       | Very low | No  | 0             | 0              |
| P74   | JAK2V617F <sup>-</sup> | 31  | F      | ---       | Very low | NA  | 0             | 1              |
| P112  | JAK2V617F <sup>-</sup> | 48  | F      | ---       | Very low | No  | 0             | 1              |

ASA: acetylsalicylic acid. CALR<sup>+</sup>: positive for calreticulin mutation. DN: double negative for JAK2V617F and CALR mutation. F: female. HU: hydroxycarbamide (hydroxyurea). Int: intermediate. JAK2V617F<sup>+</sup>: positive for JAK2V617F mutation. JAK2V617F<sup>-</sup>: negative for JAK2V617F mutation. M: male. NA: not available. VE: previous vascular event.

**Table S4.** Demographic data and clinic-laboratory parameters from patients with primary myelofibrosis (PMF).

| Code  | Mutation               | Age | Gender | Treatment | Prognostic score | VE  | Fibrosis rate | Reticulin rate | Transfusion | Stage         |
|-------|------------------------|-----|--------|-----------|------------------|-----|---------------|----------------|-------------|---------------|
| P50   | JAK2V617F <sup>+</sup> | 59  | F      | HU        | DIPSS-PLUS 2     | Yes | 4             | 4              | No          | Fib (Post-PV) |
| P51   | JAK2V617F <sup>+</sup> | 58  | M      | ---       | DIPSS-PLUS 3     | Yes | 4             | 4              | Yes         | Fib           |
| P122  | JAK2V617F <sup>+</sup> | 67  | M      | Ruxo      | DIPSS-PLUS 4     | No  | 3             | 3              | No          | Fib           |
| P72   | JAK2V617F <sup>+</sup> | 80  | M      | ---       | DIPSS-PLUS 1     | No  | 3             | 3              | No          | P/P           |
| P52   | JAK2V617F <sup>+</sup> | 62  | M      | HU        | DIPSS-PLUS 1     | Yes | 0             | 2              | No          | P/P           |
| P97   | JAK2V617F <sup>+</sup> | 73  | M      | ---       | DIPSS-PLUS 4     | No  | 4             | 4              | Yes         | Fib           |
| P103  | JAK2V617F <sup>+</sup> | 79  | M      | ---       | DIPSS-PLUS 3     | No  | 3             | 3              | No          | Fib           |
| P54.2 | JAK2V617F <sup>+</sup> | 68  | M      | HU        | DIPSS-PLUS 3     | No  | 2             | 2              | No          | Fib           |
| P96   | JAK2V617F <sup>+</sup> | 78  | M      | ---       | DIPSS-PLUS 4     | No  | 3             | 3              | Yes         | Fib           |
| P52.2 | CALR <sup>+</sup>      | 71  | F      | ---       | DIPSS-PLUS 4     | No  | 3             | 3              | No          | Fib           |
| P58   | CALR <sup>+</sup>      | 69  | M      | ---       | DIPSS-PLUS 3     | No  | 3             | 3              | Yes         | P/P           |
| P55.2 | CALR <sup>+</sup>      | 69  | F      | ---       | DIPSS-PLUS 2     | Yes | 2             | 2              | No          | P/P           |
| P49.2 | CALR <sup>+</sup>      | 68  | M      | ---       | DIPSS-PLUS 2     | No  | 2             | 2              | No          | P/P           |
| P79   | CALR <sup>+</sup>      | 54  | M      | ASA, Anag | DIPSS-PLUS 1     | Yes | 3             | 3              | No          | P/P           |
| P69   | DN                     | 73  | M      | ---       | DIPSS-PLUS 2     | No  | 3             | 3              | No          | P/P           |
| P113  | DN                     | 65  | F      | ---       | DIPSS-PLUS 4     | No  | 4             | 4              | Yes         | Fib           |

Anag: anagrelide. ASA: acetylsalicylic acid. CALR<sup>+</sup>: positive for calreticulin mutation. DN: double negative for JAK2V617F and CALR mutation. F: female. Fib: fibrotic. HU: hydroxycarbamide (hydroxyurea). Int: intermediate. JAK2V617F<sup>+</sup>: positive for JAK2V617F mutation. JAK2V617F<sup>-</sup>: negative for JAK2V617F mutation. M: male. NA: not available. P/P: prefibrotic/proliferative. Ruxo: ruxolitinib. VE: previous vascular event.

**Table S5.** Analysis of the soluble mediators levels in the bone marrow of healthy subjects (CTRL) and patients with polycythemia vera (PV), essential thrombocythemia (ET), and primary myelofibrosis (PMF).

| Soluble mediator | Median (pg/mL) and range (min-max) |                          |                          |                          | <i>p</i> -value   |               |                |                 |                |                  |
|------------------|------------------------------------|--------------------------|--------------------------|--------------------------|-------------------|---------------|----------------|-----------------|----------------|------------------|
|                  | CTRL<br>(n = 17)                   | PV<br>(n = 19)           | ET<br>(n = 28)           | PMF<br>(n = 16)          | PV<br>x<br>CTRL   | PV<br>x<br>ET | PV<br>x<br>PMF | ET<br>x<br>CTRL | ET<br>x<br>PMF | PMF<br>x<br>CTRL |
| IL-6             | 9.46<br>(3.54 - 427.7)             | 15.6<br>(5.88 - 1887.96) | 15.51<br>(6.4 - 3888)    | 9.1<br>(5.14 - 53.6)     | 0.1533            | 0.7353        | 0.0805         | 0.0841          | <b>0.0195</b>  | 0.6630           |
| IL-6Ra           | 43642<br>(30982 - 57312)           | 52108<br>(34688 - 68854) | 50259<br>(20844 - 70846) | 51576<br>(19672 - 70468) | <b>0.0005</b>     | 0.3245        | 0.6762         | 0.0613          | 0.5994         | <b>0.0246</b>    |
| IL-1 $\beta$     | 46.10<br>(21.4 - 285.7)            | 63.08<br>(50.7 - 253.4)  | 63.08<br>(23.64 - 2850)  | 48.29<br>(28.4 - 146.3)  | <b>0.0005</b>     | 0.4946        | <b>0.0092</b>  | <b>0.0073</b>   | 0.0603         | 0.5156           |
| IL-10            | 35.2<br>(22.94 - 43.24)            | 42.5<br>(26.68 - 78.86)  | 33.14<br>(16.7 - 67.56)  | 31.21<br>(6.48 - 43.24)  | 0.0565            | 0.0577        | <b>0.0037</b>  | 0.9123          | 0.2085         | 0.2192           |
| IL-17a           | 24.7<br>(15.08 - 94.36)            | 35.66<br>(26.6 - 67.7)   | 29.88<br>(11.08 - 135.3) | 26.6<br>(13.68 - 43.04)  | <b>&lt;0.0001</b> | <b>0.0179</b> | <b>0.0033</b>  | <b>0.0144</b>   | 0.1175         | 0.4049           |
| IL-12p70         | 382.3<br>(186.7 - 1121)            | 452.42<br>(263.24 - 781) | 427.1<br>(180.3 - 725.7) | 369<br>(206.7 - 1065)    | <b>0.0188</b>     | 0.2735        | <b>0.0279</b>  | 0.0879          | 0.0953         | 0.8798           |
| IL-18            | 191.9<br>(98.22 - 408.3)           | 349.86<br>(173.1 - 1405) | 252.5<br>(138.5 - 2172)  | 350.1<br>(161.6 - 884)   | <b>&lt;0.0001</b> | 0.0899        | 0.8895         | <b>0.0042</b>   | 0.1204         | <b>0.0001</b>    |
| CXCL8            | 36.94<br>(13.94 - 156.2)           | 98.26<br>(23.96 - 3788)  | 192.4<br>(14.44 - 7464)  | 71.73<br>(25.9 - 3118)   | <b>0.0198</b>     | 0.5802        | 0.5287         | <b>0.0046</b>   | 0.1837         | <b>0.0379</b>    |

## Supplementary Material

|               |                             |                             |                             |                             |                   |               |               |                   |               |               |
|---------------|-----------------------------|-----------------------------|-----------------------------|-----------------------------|-------------------|---------------|---------------|-------------------|---------------|---------------|
| CXCL10        | 65.44<br>(28.7 -<br>105.8)  | 276.7<br>(19.34 -<br>2674)  | 79.74<br>(26.8 -<br>1882)   | 93.12<br>(60.06 -<br>981.5) | <b>0.0040</b>     | <b>0.0429</b> | 0.0634        | <b>0.0490</b>     | 0.1969        | <b>0.0027</b> |
| CXCL12        | 967.7<br>(631 -<br>1488)    | 1111.4<br>(933.2 -<br>2170) | 1047<br>(390.3 -<br>2134)   | 985.1<br>(441.9 -<br>1649)  | <b>0.0102</b>     | 0.0941        | <b>0.0153</b> | 0.3556            | 0.4352        | >0.9999       |
| CCL2          | 288.9<br>(78 -<br>459.2)    | 491.86<br>(247.5 -<br>8140) | 403.2<br>(111 -<br>6180)    | 372.2<br>93.62 -<br>781.8)  | <b>0.0004</b>     | 0.3519        | <b>0.0432</b> | <b>0.0038</b>     | 0.4144        | 0.0643        |
| CCL5          | 17650<br>(8164 -<br>20632)  | 19716<br>(16646 -<br>21328) | 19877<br>(4480 -<br>21042)  | 18892<br>(8306 -<br>20374)  | <b>0.0007</b>     | 0.4951        | <b>0.0164</b> | <b>0.0015</b>     | <b>0.0103</b> | 0.3598        |
| VEGF          | 397.1<br>(267.6 -<br>579.3) | 664.58<br>(397.1 -<br>1522) | 518.3<br>(203.3 -<br>1254)  | 393.7<br>(249.8 -<br>2684)  | <b>&lt;0.0001</b> | 0.0673        | <b>0.0025</b> | <b>&lt;0.0001</b> | <b>0.0202</b> | 0.4483        |
| VEGF-R2       | 9212<br>3646 -<br>12766)    | 11128<br>7000 -<br>23278)   | 10479<br>(5052 -<br>17688)  | 9373<br>(3906 -<br>17092)   | <b>0.0331</b>     | 0.5437        | 0.1739        | 0.1003            | 0.3546        | 0.5510        |
| TNF- $\alpha$ | 44.9<br>(16.44 -<br>76.7)   | 56.28<br>(39.84 -<br>193.8) | 54.3<br>(23.66 -<br>242.2)  | 48.52<br>(19.42 -<br>111.9) | <b>&lt;0.0001</b> | 0.2082        | <b>0.0107</b> | <b>0.0096</b>     | 0.2665        | 0.1904        |
| IFN- $\gamma$ | 1855<br>(982-7 -<br>2164)   | 2164<br>(1953 -<br>2358)    | 2092<br>(538.9 -<br>2358)   | 2022<br>(1089 -<br>2240)    | <b>&lt;0.0001</b> | <b>0.0364</b> | <b>0.0010</b> | <b>0.0003</b>     | 0.0865        | 0.2258        |
| GM-CSF        | 35.3<br>(17.68 -<br>70.82)  | 50.14<br>(31.78 -<br>112.6) | 48.18<br>(21.08 -<br>140.8) | 38.04<br>(21.68 -<br>78.54) | <b>&lt;0.0001</b> | 0.2690        | <b>0.0007</b> | <b>0.0262</b>     | 0.1296        | 0.3215        |
| M-CSF         | 6116<br>(3654 -<br>7776)    | 6778<br>(6012 -<br>8922)    | 6494<br>(2638 -<br>10592)   | 6012<br>(3782 -<br>7776)    | <b>0.0071</b>     | 0.1745        | <b>0.0056</b> | 0.3029            | 0.2222        | 0.5991        |
| G-CSF         | 569.3<br>(479.5 -<br>21292) | 653.12<br>(504.9 -<br>1038) | 584.2<br>(390.3 -<br>920.7) | 594.3<br>(471.4 -<br>859.6) | 0.0731            | <b>0.0046</b> | <b>0.0231</b> | 0.6465            | 0.8420        | 0.6753        |

|     |                    |                 |                    |                   |                   |               |               |        |        |        |
|-----|--------------------|-----------------|--------------------|-------------------|-------------------|---------------|---------------|--------|--------|--------|
|     | 392.7              | 793.88          | 396.3              | 342.4             |                   |               |               |        |        |        |
| HGF | (178.3 -<br>780.4) | (373 -<br>5888) | (169.4 -<br>975.5) | (158.1 -<br>5138) | <b>&lt;0.0001</b> | <b>0.0003</b> | <b>0.0060</b> | 0.3869 | 0.8327 | 0.9929 |

Bold values indicate statistical difference ( $p < 0.05$ )

**Table S6.** Results of the correlation analysis between soluble mediator levels and hematological parameters from patients with polycythemia vera (n=19).

| Soluble mediator | Comparison ( <i>p</i> -value, <i>r</i> -value) |                            |                            |                           |                            |
|------------------|------------------------------------------------|----------------------------|----------------------------|---------------------------|----------------------------|
|                  | HGB                                            | HCT                        | WBC                        | RBC                       | PLT                        |
| IL-6             | 0.4659,<br>0.0211                              | 0.4631,<br>-0.0228         | 0.4461,<br>0.1474          | 0.4957,<br>0.0026         | 0.4461,<br>-0.0333         |
| IL-6Ra           | 0.2033,<br>0.2021                              | <b>0.0452</b> ,<br>0.3993  | <b>0.0255</b> ,<br>0.4537  | <b>0.0073</b> ,<br>0.5505 | 0.2272,<br>0.1825          |
| IL-1 $\beta$     | 0.2418,<br>-0.1711                             | 0.3779,<br>-0.0765         | 0.3943,<br>0.0659          | 0.2853,<br>0.1389         | 0.3029,<br>0.1265          |
| IL-10            | 0.2176,<br>-0.1903                             | 0.0993,<br>-0.3086         | 0.2959,<br>-0.1314         | 0.3685,<br>-0.0825        | 0.1352,<br>-0.2663         |
| IL-17a           | 0.4978,<br>0.0013                              | 0.3867,<br>-0.0708         | 0.2165,<br>0.1912          | 0.0918,<br>0.3187         | 0.0581,<br>0.3726          |
| IL-12p70         | 0.0728,<br>-0.3470                             | 0.0637,<br>-0.3624         | 0.3078,<br>0.1231          | 0.1132,<br>0.2912         | 0.4971,<br>-0.0018         |
| IL-18            | 0.1580,<br>-0.2431                             | 0.1933,<br>-0.2107         | 0.1079,<br>-0.2976         | 0.4460,<br>-0.0334        | 0.1243,<br>-0.2783         |
| CXCL8            | 0.4208,<br>0.0492                              | 0.4744,<br>0.0158          | 0.3262,<br>0.1105          | 0.2795,<br>0.1430         | 0.2230,<br>-0.1860         |
| CXCL10           | 0.2281,<br>-0.1818                             | 0.3108,<br>-0.1211         | 0.4489,<br>-0.0316         | 0.3352,<br>0.1044         | <b>0.0113</b> ,<br>-0.5193 |
| CXCL12           | 0.4179,<br>-0.0510                             | 0.2384,<br>-0.1738         | 0.1785,<br>-0.2238         | 0.4159,<br>-0.0522        | 0.4278,<br>0.0448          |
| CCL2             | 0.4730,<br>0.0167                              | 0.3366,<br>-0.1035         | 0.2430,<br>-0.1702         | 0.1718,<br>-0.2299        | <b>0.0190</b> ,<br>-0.4789 |
| CCL5             | <b>0.0191</b> ,<br>-0.4787                     | <b>0.0007</b> ,<br>-0.6772 | <b>0.0319</b> ,<br>-0.4333 | 0.1756,<br>-0.2264        | 0.4773,<br>0.0140          |
| VEGF             | <b>0.0493</b> ,<br>0.3902                      | 0.1260,<br>0.2764          | <b>0.0337</b> ,<br>0.4283  | 0.0546,<br>0.3793         | 0.0857,<br>0.3273          |

|               |                            |                            |                    |                           |                     |
|---------------|----------------------------|----------------------------|--------------------|---------------------------|---------------------|
| VEGF-R2       | 0.0990,<br>-0.3090         | 0.1981,<br>-0.2066         | 0.1695,<br>-0.2321 | 0.3021,<br>-0.1271        | 0.2853,<br>-0.1389  |
| TNF- $\alpha$ | 0.3994,<br>0.0627          | 0.4643,<br>0.0201          | 0.0516,<br>0.3854  | <b>0.0178</b> ,<br>0.4843 | 0.1134,<br>0.2910   |
| IFN- $\gamma$ | <b>0.0454</b> ,<br>-0.3988 | <b>0.0066</b> ,<br>-0.5572 | 0.1060,<br>-0.3000 | 0.1756,<br>-0.2265        | 0.1483,<br>0.2527   |
| GM-CSF        | 0.3463,<br>-0.0971         | 0.2005,<br>-0.2045         | 0.2947,<br>-0.1322 | 0.4864,<br>-0.0084        | 0.0598,<br>-0.3693  |
| M-CSF         | <b>0.0262</b> ,<br>-0.0555 | <b>0.0067</b> ,<br>-0.5557 | 0.3426,<br>-0.0995 | 0.4107,<br>-0.0555        | 0.4615,<br>-0.02378 |
| G-CSF         | 0.2509,<br>-0.1642         | 0.1375,<br>-0.2639         | 0.3807,<br>0.0746  | 0.1287,<br>0.2734         | 0.0896,<br>0.3217   |
| HGF           | 0.2337,<br>0.1774          | 0.3794,<br>0.0754          | 0.1207,<br>0.2825  | <b>0.0124</b> ,<br>0.5124 | 0.0992,<br>0.3088   |

Bold values indicate statistical difference ( $p < 0.05$ ). HCT: hematocrit. HGB: hemoglobin concentration. RBC: red blood cell count. PLT: platelet count. WBC: white blood cell count.

**Table S7.** Results of the correlation analysis between soluble mediator levels and hematological parameters from patients with essential thrombocythemia (n=28).

| Soluble mediator | Comparison ( $p$ -value, $r$ -value) |                           |                           |                           |                    |
|------------------|--------------------------------------|---------------------------|---------------------------|---------------------------|--------------------|
|                  | HGB                                  | HCT                       | WBC                       | RBC                       | PLT                |
| IL-6             | 0.4749,<br>0.0125                    | 0.3835,<br>0.0586         | 0.3035,<br>-0.1016        | 0.3320,<br>-0.0859        | 0.2256,<br>-0.1484 |
| IL-6Ra           | <b>0.0266</b> ,<br>0.3691            | 0.1350,<br>0.2158         | <b>0.0083</b> ,<br>0.4489 | <b>0.0144</b> ,<br>0.4133 | 0.1405,<br>0.2111  |
| IL-1 $\beta$     | <b>0.0288</b> ,<br>0.3630            | <b>0.0402</b> ,<br>0.3360 | 0.4370,<br>0.0314         | 0.1735,<br>0.1846         | 0.4124,<br>0.0438  |
| IL-10            | <b>0.0371</b> ,<br>0.3428            | 0.0893,<br>0.2616         | 0.4779,<br>-0.0110        | 0.3786,<br>0.0612         | 0.2903,<br>-0.1091 |
| IL-17a           | 0.0870,<br>0.2644                    | 0.1333,<br>0.2173         | 0.1758,<br>0.1829         | 0.4305,<br>0.0347         | 0.1361,<br>0.2149  |
| IL-12p70         | 0.1000,<br>0.2497                    | 0.1967,<br>0.1678         | 0.3635,<br>0.0690         | 0.2226,<br>0.1503         | 0.1922,<br>0.1710  |
| IL-18            | <b>0.0204</b> ,<br>0.3889            | 0.0758,<br>0.2782         | 0.2504,<br>0.1327         | 0.4035,<br>0.0484         | 0.2106,<br>-0.1583 |
| CXCL8            | 0.4724,<br>0.0137                    | 0.2602,<br>0.1268         | 0.4017,<br>-0.0493        | 0.4901,<br>-0.0049        | 0.4233,<br>0.0383  |



|               |                           |                           |                    |                           |                           |
|---------------|---------------------------|---------------------------|--------------------|---------------------------|---------------------------|
| CXCL10        | 0.2378,<br>0.1405         | 0.1426,<br>0.2092         | 0.2903,<br>0.1091  | 0.4928,<br>-0.0036        | 0.2721,<br>-0.1196        |
| CXCL12        | 0.4732,<br>0.0133         | 0.4045,<br>-0.0478        | 0.3552,<br>-0.0734 | 0.3708,<br>-0.0652        | 0.4053,<br>-0.0244        |
| CCL2          | 0.3938,<br>0.0533         | 0.1894,<br>0.1730         | 0.4393,<br>-0.0303 | 0.3795,<br>-0.0507        | 0.2014,<br>-0.1645        |
| CCL5          | 0.3187,<br>0.0931         | 0.3683,<br>0.6665         | 0.0858,<br>0.2658  | 0.3265,<br>0.0889         | <b>0.0477</b> ,<br>0.3213 |
| VEGF          | 0.2122,<br>0.1572         | 0.2273,<br>0.1472         | 0.4,48,<br>-0.0325 | 0.4090, 40.0455           | 0.3850,<br>0.0578         |
| VEGF-R2       | 0.4829,<br>-0.0085        | 0.3596,<br>-0.0711        | 0.0744<br>0.2801   | <b>0.0476</b> ,<br>0.3215 | <b>0.0179</b> ,<br>0.3985 |
| TNF- $\alpha$ | 0.0675,<br>0.2895         | 0.2859,<br>0.1116         | 0.3024,<br>-0.1022 | 0.1743,<br>0.1840         | 0.2780,<br>-0.1162        |
| IFN- $\gamma$ | 0.1505,<br>0.2026         | 0.2996,<br>0.1038         | 0.3587,<br>0.0716  | 0.4900,<br>-0.0050        | 0.1678,<br>0.1889         |
| GM-CSF        | 0.0527,<br>0.3126         | <b>0.0182</b> ,<br>0.3973 | 0.4592,<br>0.0203  | 0.0861,<br>0.2655         | 0.3984,<br>0.0510         |
| M-CSF         | 0.2064,<br>0.1611         | 0.4583,<br>0.0207         | 0.4470,<br>0.0264  | 0.4295,<br>0.0352         | 0.4078,<br>0.0461         |
| G-CSF         | <b>0.0345</b> ,<br>0.3486 | 0.1214,<br>0.2282         | 0.0992,<br>0.2506  | 0.2180,<br>0.1533         | 0.2083,<br>0.1598         |
| HGF           | 0.2663,<br>0.1231         | 0.3970,<br>0.0517         | 0.1060,<br>0.2434  | 0.4614,<br>-0.0192        | 0.1869,<br>0.1748         |

Bold values indicate statistical difference ( $p < 0.05$ ). HCT: hematocrit. HGB: hemoglobin concentration. RBC: red blood cell count. PLT: platelet count. WBC: white blood cell count

**Table S8.** Results of the correlation analysis between soluble mediator levels and hematological parameters from patients with primary myelofibrosis (n=16).

| Soluble mediator | Comparison ( $p$ -value, $r$ - value) |                            |                    |                            |                    |
|------------------|---------------------------------------|----------------------------|--------------------|----------------------------|--------------------|
|                  | HGB                                   | HCT                        | WBC                | RBC                        | PLT                |
| IL-6             | <b>0.0150</b> ,<br>-0.5453            | <b>0.0364</b> ,<br>-0.1252 | 0.3191,<br>-0.1252 | <b>0.0270</b> ,<br>-0.4908 | 0.0879,<br>-0.4011 |
| IL-6Ra           | 0.4132,<br>-0.0597                    | 0.4462,<br>-0.0368         | 0.3028,<br>0.1398  | 0.4376,<br>-0.0427         | 0.2436,<br>0.2118  |

|               |                            |                            |                           |                            |                    |
|---------------|----------------------------|----------------------------|---------------------------|----------------------------|--------------------|
| IL-1 $\beta$  | 0.4978,<br>0.0015          | 0.4439,<br>-0.0384         | 0.2705,<br>-0.1652        | 0.4225,<br>0.0531          | 0.3943,<br>0.0825  |
| IL-10         | <b>0.0119</b> ,<br>-0.4798 | <b>0.0114</b> ,<br>-0.4832 | 0.3517,<br>-0.0860        | <b>0.0152</b> ,<br>-0.4619 | 0.1550,<br>-0.2460 |
| IL-17a        | 0.1101,<br>-0.3165         | 0.1228,<br>-0.3082         | 0.2732,<br>0.1630         | 0.0968,<br>-0.3336         | 0.3557,<br>-0.1137 |
| IL-12p70      | 0.2536,<br>-0.1790         | 0.2030,<br>-0.2232         | 0.3454,<br>0.1079         | 0.0901,<br>-0.3528         | 0.1710,<br>0.2869  |
| IL-18         | 0.2541,<br>-0.1786         | 0.3357,<br>-0.1150         | 0.6340,<br>0.0944         | 0.1144,<br>-0.3188         | 0.2182,<br>-0.2366 |
| CXCL8         | 0.1256,<br>-0.3046         | 0.1933,<br>-0.2324         | 0.3685,<br>0.0912         | 0.2253,<br>-0.2031         | 0.2468,<br>-0.2088 |
| CXCL10        | <b>0.0028</b> ,<br>-0.6583 | <b>0.0034</b> ,<br>-0.6461 | 0.1854,<br>-0.2399        | <b>0.0226</b> ,<br>-0.5066 | 0.0872,<br>-0.4011 |
| CXCL12        | 0.2034,<br>0.2229          | 0.1774,<br>0.2478          | 0.3518,<br>0.1032         | 0.2230,<br>0.2052          | 0.2350,<br>0.2201  |
| CCL2          | 0.1393,<br>-0.2884         | 0.1064,<br>-0.3294         | 0.3010,<br>-0.1412        | 0.2820,<br>-0.1560         | 0.2706,<br>0.1868  |
| CCL5          | 0.3974,<br>0.0706          | 0.3401,<br>0.1118          | 0.2255,<br>0.2029         | 0.3808,<br>0.0824          | 0.0840,<br>0.4066  |
| VEGF          | 0.4098,<br>-0.0620         | 0.4311,<br>-0.0472         | 0.4870,<br>0.0089         | 0.1477,<br>-0.2790         | 0.2210,<br>0.2338  |
| VEGF-R2       | 0.3183,<br>0.1280          | 0.2058,<br>0.2206          | <b>0.0349</b> ,<br>0.4647 | 0.2691,<br>0.1663          | 0.1274,<br>0.3407  |
| TNF- $\alpha$ | 0.3200,<br>-0.1268         | 0.4079,<br>-0.0633         | 0.2969,<br>0.1443         | 0.1843,<br>0.2410          | 0.2642,<br>0.1926  |
| IFN- $\gamma$ | 0.4913,<br>0.0059          | 0.4718,<br>0.0193          | 0.1299,<br>0.2995         | 0.4956,<br>-0.0030         | 0.1009,<br>0.3789  |
| GM-CSF        | <b>0.0014</b> ,<br>-0.6934 | <b>0.0029</b> ,<br>-0.6568 | 0.4058,<br>0.0648         | <b>0.0120</b> ,<br>-0.5601 | 0.4573,<br>-0.0033 |
| M-CSF         | 0.3743,<br>0.0870          | 0.3102,<br>0.1341          | 0.0682,<br>0.3891         | 0.4247,<br>0.0516          | 0.3770,<br>0.0964  |
| G-CSF         | 0.2650,<br>-0.1696         | 0.2817,<br>-0.1562         | 0.4935,<br>0.0044         | 0.1275,<br>-0.3024         | 0.4432,<br>-0.0441 |
| HGF           | 0.4849,<br>-0.0103         | 0.3705,<br>-0.0898         | 0.2009,<br>0.2252         | 0.1261,<br>-0.3041         | 0.2613,<br>0.1953  |

Bold values indicate statistical difference ( $p < 0.05$ ). HCT: hematocrit. HGB: hemoglobin concentration. RBC: red blood cell count. PLT: platelet count. WBC: white blood cell count

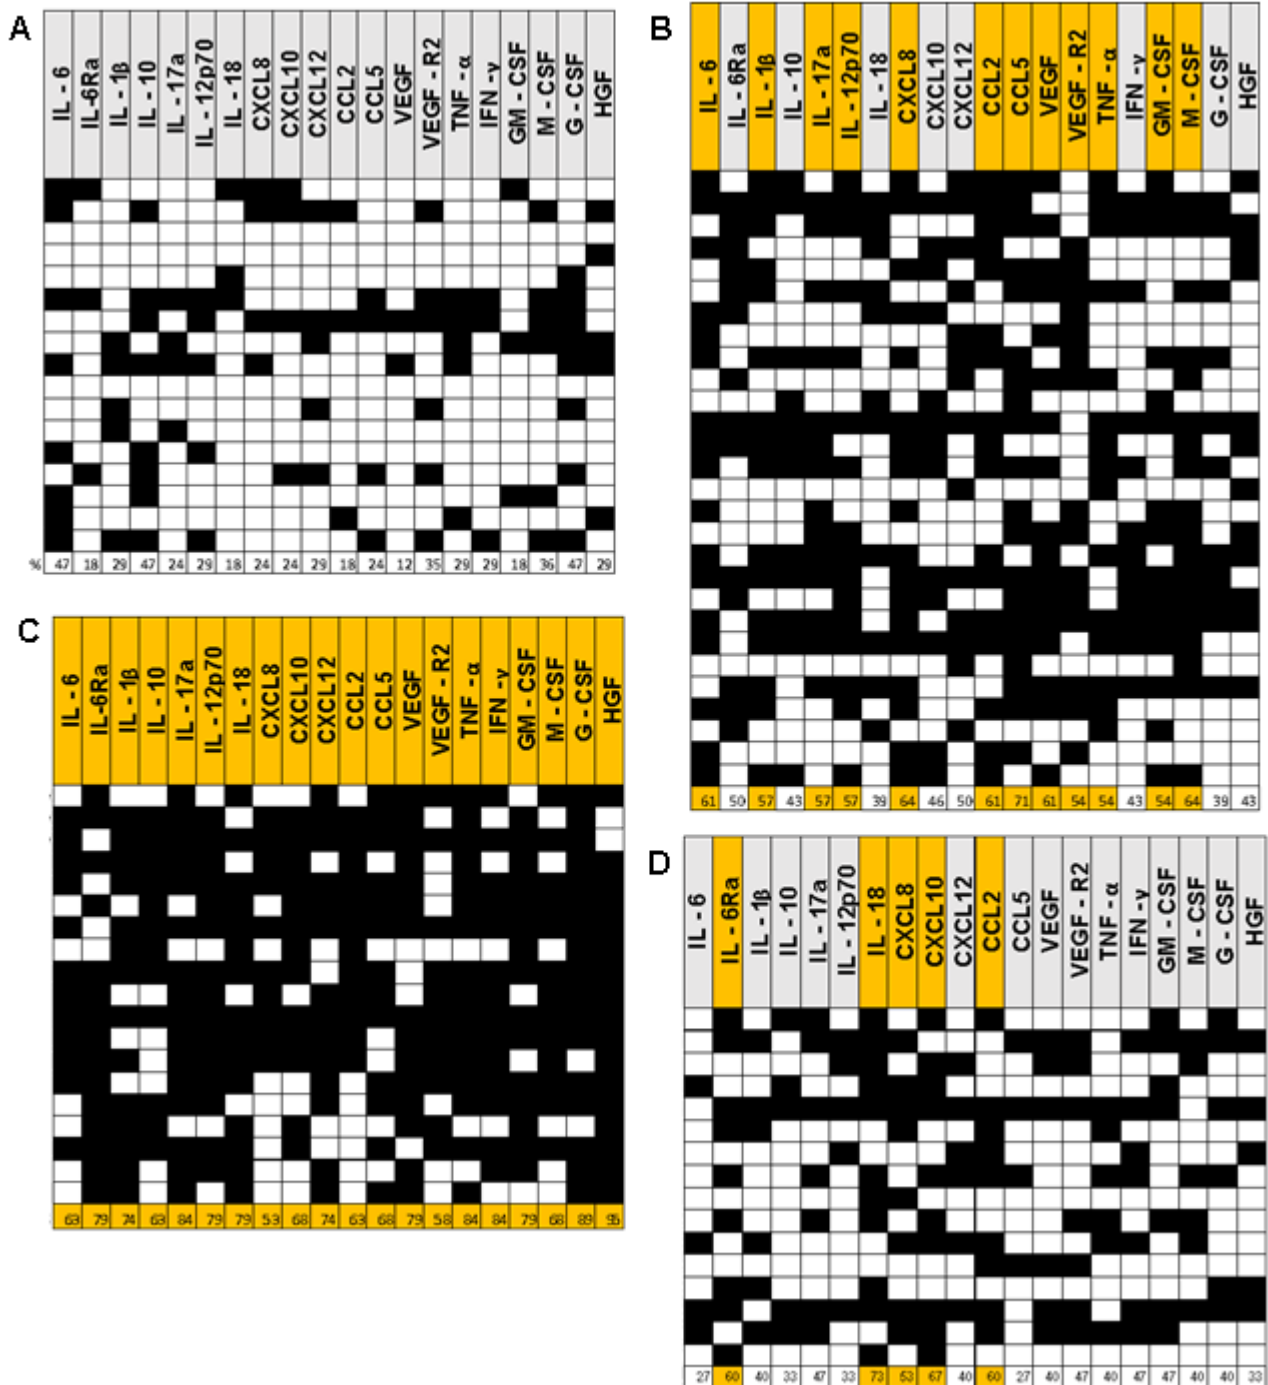

**Figure S1.** Bone marrow soluble mediator signatures. (A) Healthy subjects (CTRL, n=17). CTRL group showed low frequency (<50% of group individuals) of high soluble mediator producers for all analyzed mediators. Patients with (B) essential thrombocythemia (ET, n=28), (C) polycythemia vera (PV, n=19), and (D) primary myelofibrosis (PMF, n=16). Soluble mediator production was stratified as high and low. Black blocks indicate high producers and white blocks indicate low producers of each soluble mediator analyzed. Each column represents one analyte, and each row represents one subject. The number below each column corresponds to the frequency of high producers (%). The soluble mediator is highlighted when the frequency of high producers exceeded 50% of the group individuals, and the soluble mediator was considered relevant for the disease.

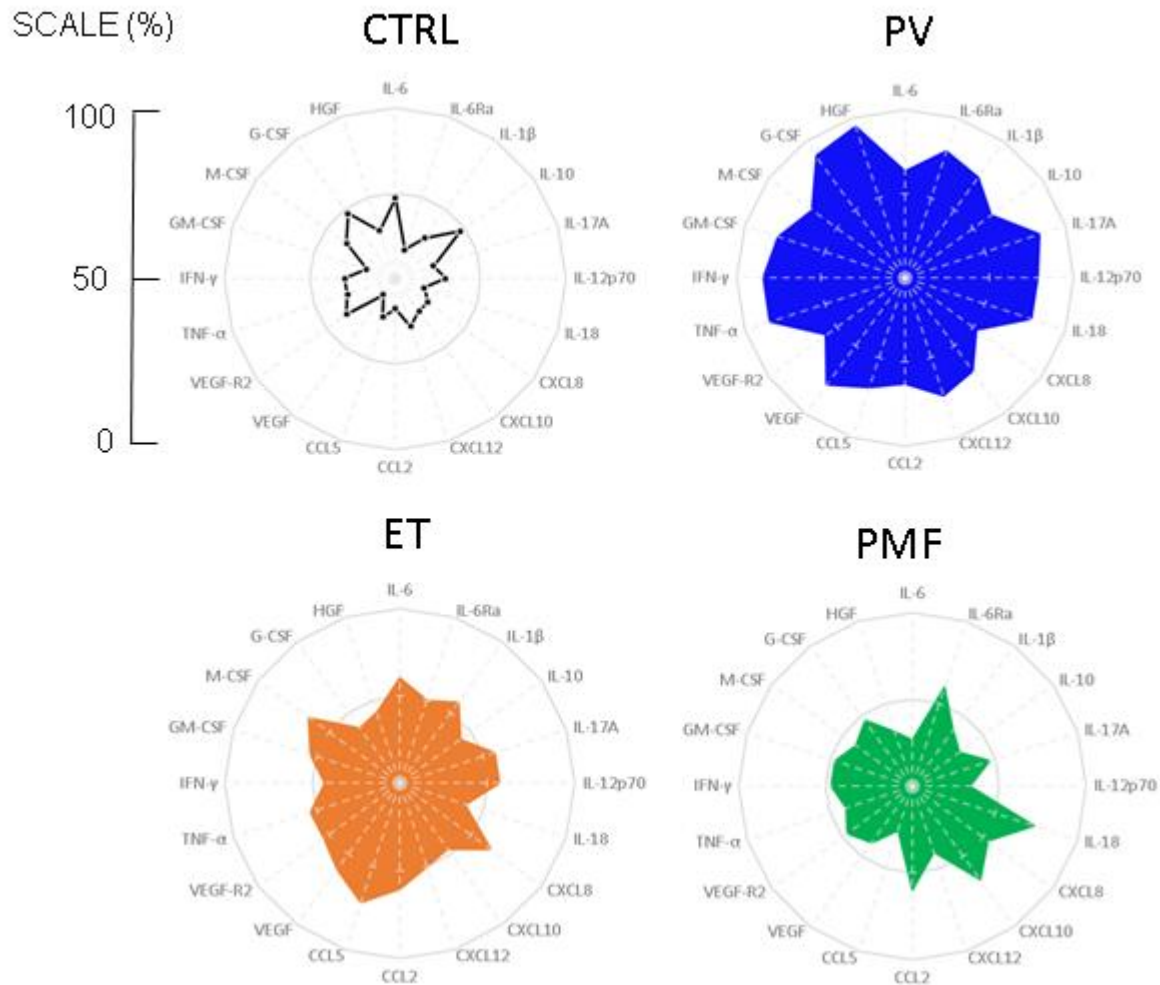

**Figure S2.** Spider charts of soluble mediator signatures from healthy subjects (CTRL, n=17) and patients with essential thrombocythemia (ET, n=28), polycythemia vera (PV, n=19), and primary myelofibrosis (PMF, n=16). Comparison of frequency of overall mediator production among the disease subtypes. The results are expressed in percentage.

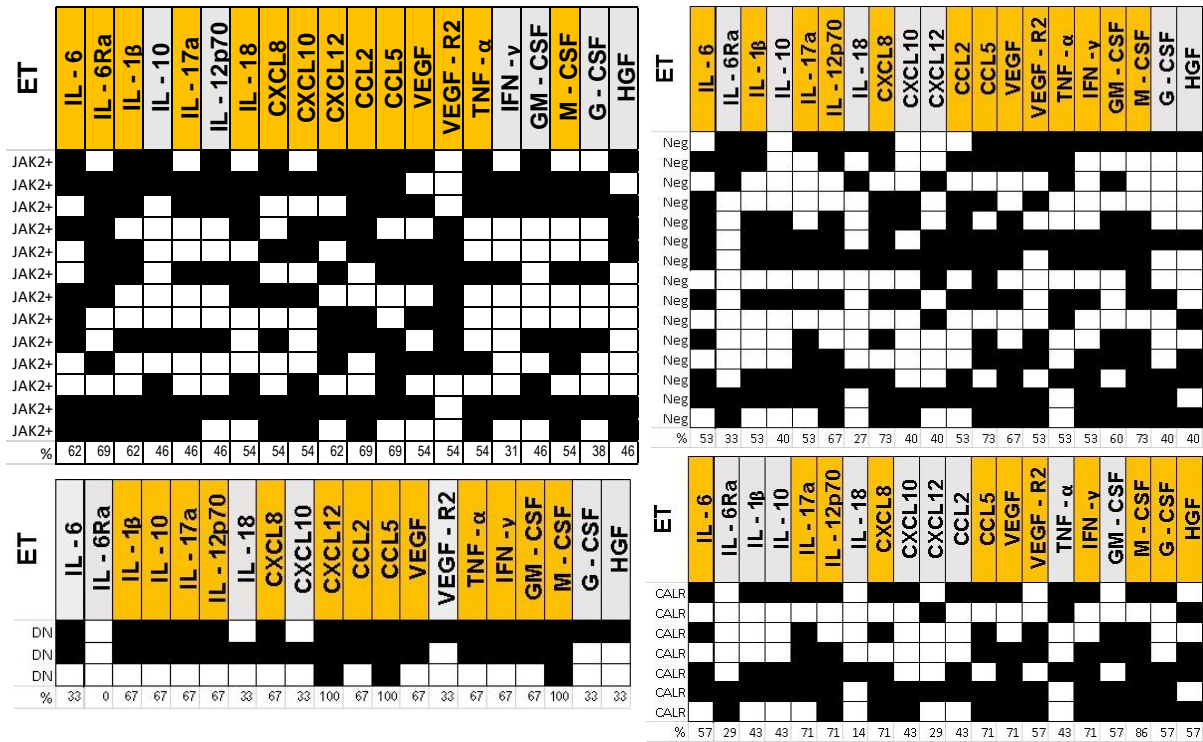

**Figure S3.** Association between driver mutation *status* and soluble mediator signature in patients with essential thrombocythemia (ET). JAK2V617<sup>+</sup> (n=13; ET patients positive for JAK2V617F mutation), JAK2V617F<sup>-</sup> (n=15; ET patients negative for JAK2V617F mutation), CALR<sup>+</sup> (n=7; patients positive for calreticulin mutation), DN (n=3; double negative patients). Soluble mediator production was stratified as high and low. Black blocks indicate high producers and white blocks indicate low producers of each soluble mediator analyzed. Each column represents one analyte, and each row represents one individual. The number below each column corresponds to the frequency of high producers. Yellow boxes indicate that more than 50% of the individuals of the group were high producers of that soluble mediator.

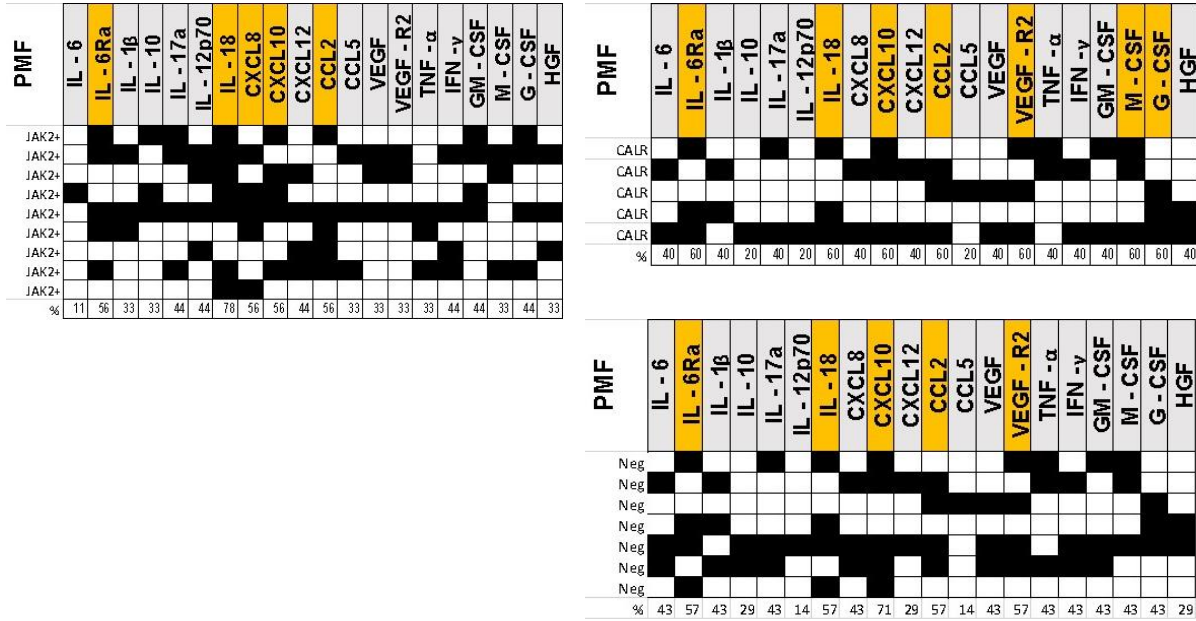

**Figure S4.** Association between driver mutation status and soluble mediator signature in patients with primary myelofibrosis (PMF). JAK2V617<sup>+</sup> (n=9; PMF patients positive for JAK2V617F mutation), JAK2V617F<sup>-</sup> (n=7; PMF patients negative for JAK2V617F mutation), CALR<sup>+</sup> (n=5; PMF patients positive for calreticulin mutation). Soluble mediator production was stratified as high and low. Black blocks indicate high producers and white blocks indicate low producers of each soluble mediator analyzed. Each column represents one analyte, and each row represents one individual. The number below each column corresponds to the frequency of high producers. Yellow boxes indicate that more than 50% of the individuals of the group were high producers of that soluble mediator.
